# Supplementary material for: Stable carbon isotope deviations in benthic foraminifera as proxy for organic carbon fluxes in the Mediterranean Sea
Source: Copernicus journal article supplement (doi:10.5194/bg-2016-247), 2016-06-09
Supplement: Supplementary file 1 [file bg-2016-247-supplement.pdf]

|       |       |      |  |  |       |      |      |      |       |      |       |      |       |       |       |      |                 |
|-------|-------|------|--|--|-------|------|------|------|-------|------|-------|------|-------|-------|-------|------|-----------------|
| 375   |       |      |  |  | 0,03  | 1,76 |      |      | -0,15 | 1,88 | 0,03  | 2,03 | -0,75 | 2,17  |       |      | -0,91           |
| 375   |       |      |  |  |       |      |      |      |       |      |       |      | -0,77 | 2,20  |       |      |                 |
| 400   |       |      |  |  |       |      |      |      |       |      |       |      |       |       |       |      |                 |
| 400   |       |      |  |  |       |      |      |      |       |      |       |      |       |       |       |      |                 |
| 400   |       |      |  |  |       |      |      |      |       |      |       |      |       |       |       |      |                 |
| 400   |       |      |  |  |       |      |      |      |       |      |       |      |       |       |       |      |                 |
| 400   |       |      |  |  |       |      |      |      |       |      |       |      |       |       |       |      |                 |
| 408   |       |      |  |  | 0,04  | 2,16 |      |      |       |      |       |      |       |       |       |      | -1,00           |
| 425   |       |      |  |  |       |      | 0,41 | 1,85 | -0,10 | 1,83 | -0,43 | 1,81 | 0,64  | 1,99  | -0,67 | 2,30 |                 |
| 425   |       |      |  |  |       |      |      |      | 0,46  | 1,75 | 0,14  | 2,07 | 0,55  | 1,94  | -0,68 | 2,29 |                 |
| 425   |       |      |  |  |       |      |      |      | 0,39  | 1,78 |       |      |       |       |       |      |                 |
| 442   | -0,63 | 2,27 |  |  |       |      |      |      |       |      |       |      |       |       |       |      |                 |
| 445   |       |      |  |  | -0,02 | 2,26 |      |      |       |      |       |      |       |       |       |      |                 |
| 475   |       |      |  |  |       |      |      |      | -0,07 | 2,09 | 0,11  | 1,99 | 0,69  | 2,14  | -0,80 | 2,26 | -0,70           |
| 475   |       |      |  |  |       |      |      |      |       |      |       |      |       |       | -0,63 | 2,39 |                 |
| 500   |       |      |  |  |       |      |      |      |       |      |       | 0,00 | 1,94  |       |       |      |                 |
| 525   |       |      |  |  | 0,20  | 2,30 |      |      | 0,62  | 1,91 | 0,06  | 2,03 | 0,53  | 1,99  | -0,68 | 2,34 | 0,36 2,93 -0,62 |
| 525   |       |      |  |  |       |      |      |      |       |      |       |      |       | -0,64 | 2,32  |      |                 |
| 525   |       |      |  |  |       |      |      |      |       |      |       |      |       | -0,30 | 2,24  |      |                 |
| 525   |       |      |  |  |       |      |      |      |       |      |       |      |       | -0,90 | 2,23  |      |                 |
| 550   |       |      |  |  |       |      |      |      |       |      |       |      |       |       |       |      |                 |
| 575   |       |      |  |  |       |      | 1,31 | 2,03 | -0,08 | 2,11 | -0,03 | 1,99 | 1,08  | 2,18  | 0,31  | 2,56 | -0,54           |
| 575   |       |      |  |  |       |      |      |      | 0,64  | 1,91 | 0,07  | 1,96 | 1,03  | 2,00  | -0,41 | 2,49 | -0,58           |
| 575   |       |      |  |  |       |      |      |      |       |      |       |      |       |       | -0,30 | 2,39 |                 |
| 575   |       |      |  |  |       |      |      |      |       |      |       |      |       |       | -0,36 | 2,38 |                 |
| 600   |       |      |  |  |       |      |      |      |       |      | 0,06  | 2,09 |       |       |       |      |                 |
| 612.5 |       |      |  |  |       |      |      |      |       |      |       |      |       |       |       |      |                 |
| 612.5 |       |      |  |  |       |      |      |      |       |      |       |      |       |       |       |      |                 |
| 625   | -0,84 | 2,24 |  |  |       |      | 0,80 | 1,99 |       |      | 0,12  | 1,99 | 0,57  | 2,03  | -0,58 | 2,28 | 0,61 2,48       |
| 625   |       |      |  |  |       |      | 1,12 | 2,03 |       |      | 0,13  | 2,05 | 0,93  | 2,19  | -0,43 | 2,16 | 0,73 2,42       |
| 625   |       |      |  |  |       |      | 0,67 | 2,09 |       |      |       |      | 0,37  | 2,09  | -0,53 | 2,25 |                 |





|     |  |      |      |      |      |      |      |           |
|-----|--|------|------|------|------|------|------|-----------|
| 410 |  |      |      |      | 1,38 | 1,46 |      |           |
| 420 |  |      |      | 1,92 | 1,40 |      | 1,90 | 1,64      |
| 447 |  |      |      |      |      |      |      |           |
| 465 |  | 0,99 | 1,27 |      |      |      |      |           |
| 470 |  |      |      |      |      |      | 1,89 | 1,78      |
| 480 |  |      |      | 1,95 | 1,43 |      |      |           |
| 490 |  |      |      | 1,30 | 1,51 |      |      | 1,01 1,80 |
| 495 |  |      |      |      |      |      |      |           |
| 505 |  |      |      |      |      |      |      |           |
| 520 |  |      |      | 2,06 | 1,43 | 1,47 | 1,71 | 0,95 1,88 |
| 550 |  |      |      |      |      |      |      | 1,67 1,87 |
| 555 |  |      |      |      |      |      |      |           |
| 570 |  |      |      | 2,00 | 1,56 |      |      |           |
| 580 |  |      |      |      |      |      | 1,57 | 1,70      |
| 590 |  |      |      | 1,15 | 1,69 |      |      |           |
| 600 |  |      |      | 1,83 | 1,57 |      |      |           |
| 620 |  |      |      |      |      |      | 1,92 | 1,99      |
| 640 |  |      |      | 1,62 | 1,59 | 2,00 | 1,60 |           |
| 650 |  |      |      |      |      | 1,21 | 1,62 |           |
| 660 |  |      |      | 1,12 | 1,58 |      |      |           |
| 680 |  |      |      |      |      |      |      |           |
| 700 |  |      |      | 1,49 | 1,55 |      |      |           |
| 710 |  | 0,98 | 1,24 |      |      |      |      |           |
| 710 |  |      |      |      |      | 1,78 | 1,52 |           |
| 720 |  |      |      |      |      |      |      |           |
| 750 |  |      |      |      |      |      |      |           |
| 760 |  |      |      |      |      |      | 1,46 | 1,60      |
| 770 |  |      |      |      |      |      |      | 0,57 1,98 |
| 780 |  |      |      |      |      |      |      |           |
| 820 |  |      |      |      |      |      | 1,14 | 1,79      |
| 840 |  |      |      |      |      | 1,23 | 1,73 |           |
| 840 |  |      |      |      |      | 1,19 | 1,72 |           |
| 900 |  |      |      |      |      | 1,27 | 1,71 |           |



















|  |      |       |      |      |      |      |      |      |
|--|------|-------|------|------|------|------|------|------|
|  | 0,01 | -1,63 |      |      |      |      |      |      |
|  |      | 1,31  | 1,72 |      | 1,37 | 1,72 |      |      |
|  |      |       |      |      | 1,31 | 1,84 |      |      |
|  |      |       |      | 1,25 | 1,60 |      | 1,33 | 1,75 |
|  | 1,22 | 1,75  |      | 1,10 | 1,61 |      | 0,99 | 0,99 |
|  |      | 1,29  | 1,70 |      |      |      |      |      |
|  |      | 1,29  | 1,80 |      |      |      |      |      |
|  |      | 1,06  | 1,43 |      |      |      |      |      |
|  |      |       |      |      |      |      | 0,88 | 1,71 |
|  |      |       |      | 0,90 | 1,55 |      |      |      |
|  |      | 1,13  | 1,68 |      |      |      |      |      |
